# Supplementary material for: Investigation of the Tetrakis(dimethylamino)hafnium and H2S ALD Process: Effects of Deposition Temperature and Annealing
Source: MDPI journal article supplement (doi:10.3390/solids3020018), 2022-05-05
Supplement: s1 [file s1]

Supplementary materials to the paper:  
Atomic layer deposition of  $\text{HfS}_2$  from Tetrakis(dimethylamino)hafnium  
Zsófia Baji\*, Zsolt Fogarassy, Attila Sulyok, Péter Petrik  
Centre for Energy Research, Institute of Technical Physics and Materials Science  
Konkoly Thege M. út 29-33, 1121 Budapest, Hungary

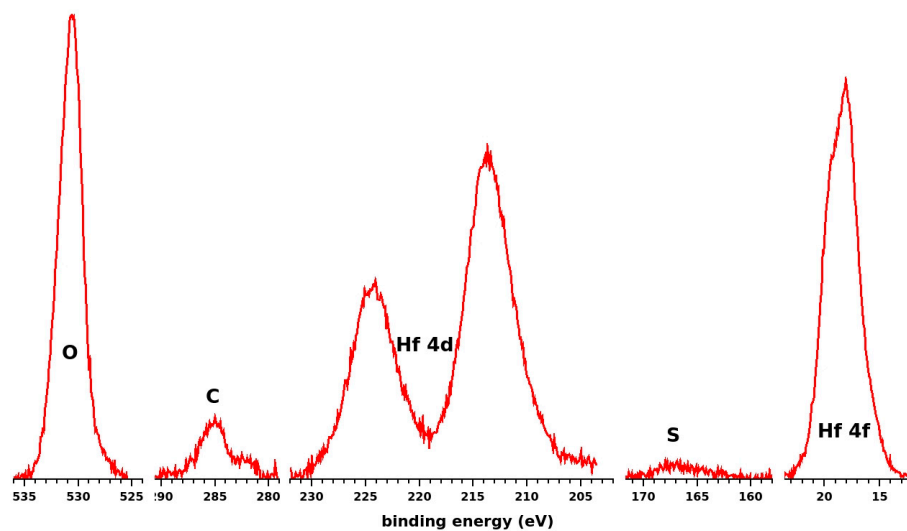

Figure S1. XPS spectrum observed on 400°C  $\text{HfS}_2$  layer. It shows a low S content and partially oxidized state of Hf.

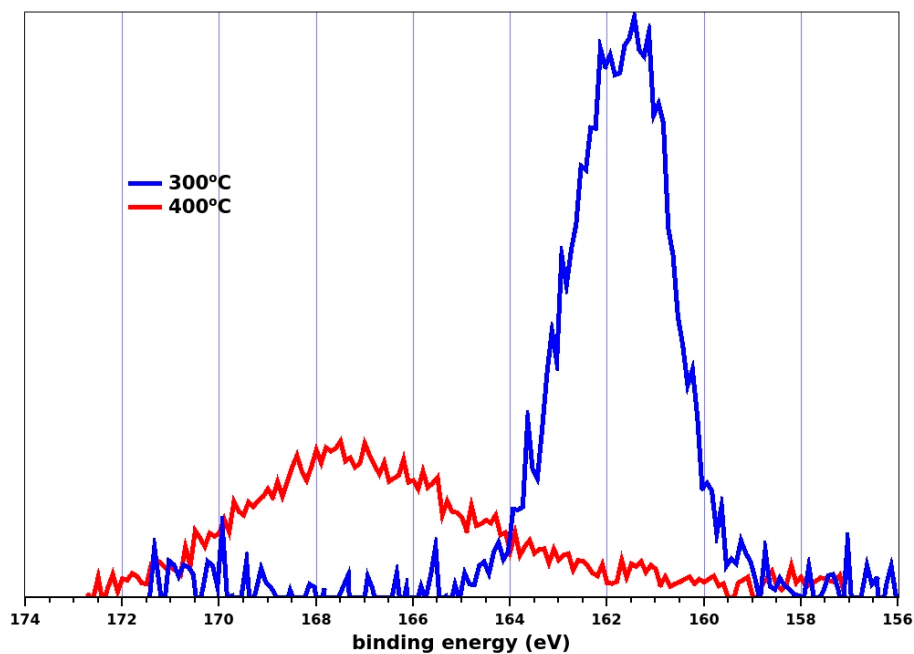

Figure S2. The alteration of sulfur chemical state is shown here by the S 2p peak. The change of binding energy clearly shows that the layer made at 300°C is in a well-defined sulfide state while the 400°C layer presents a mixture of differently oxidized sulfur compounds ( $\text{SO}_3$  and  $\text{SO}_4$ ) with smeared peak shape.
